# Supplementary material
Source: PubMed Central journal article supplement (PMC9555871)
Supplement: NIHMS1817334-supplement-Supplemental_Data_File__doc__pdf__etc__.pdf [file NIHMS1817334-supplement-Supplemental_Data_File__doc__pdf__etc__.pdf]

# Rationale and Design for the *Diabetes RElated to Acute Pancreatitis and Its Mechanisms (DREAM) Study*

## *A Prospective Cohort Study From the Type 1 Diabetes in Acute Pancreatitis Consortium (T1DAPC)*

### SUPPLEMENTAL DIGITAL CONTENT

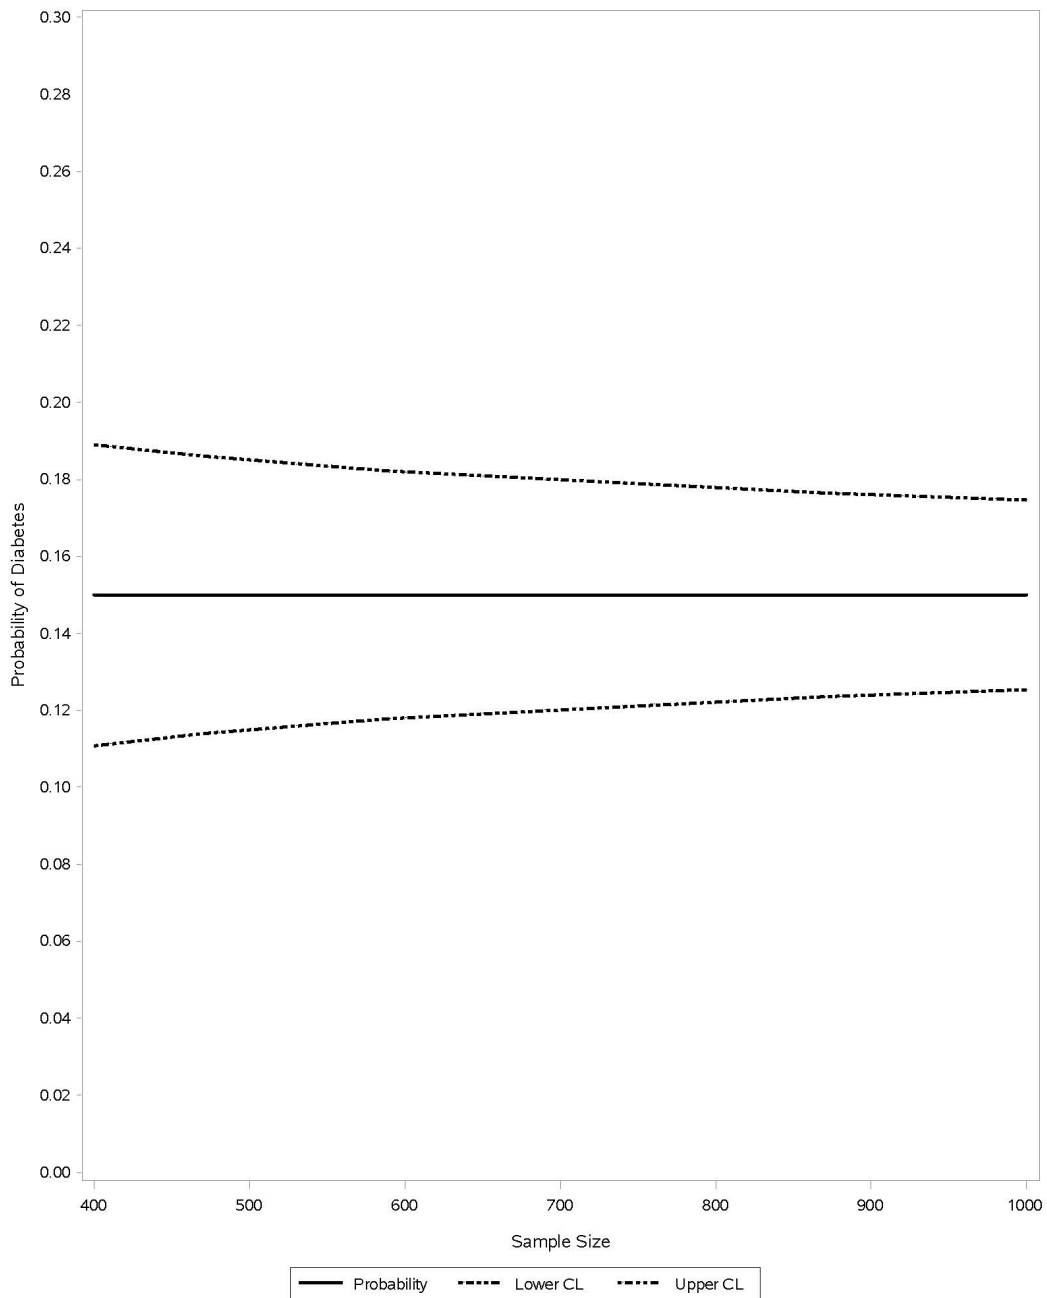

**SUPPLEMENTAL FIGURE 1.** The 95% confidence intervals for estimating the incidence rate of DM in the Diabetes Related to Acute Pancreatitis and its Mechanisms (DREAM) Study across different sample size estimates according to a discrete time-to-event analysis.

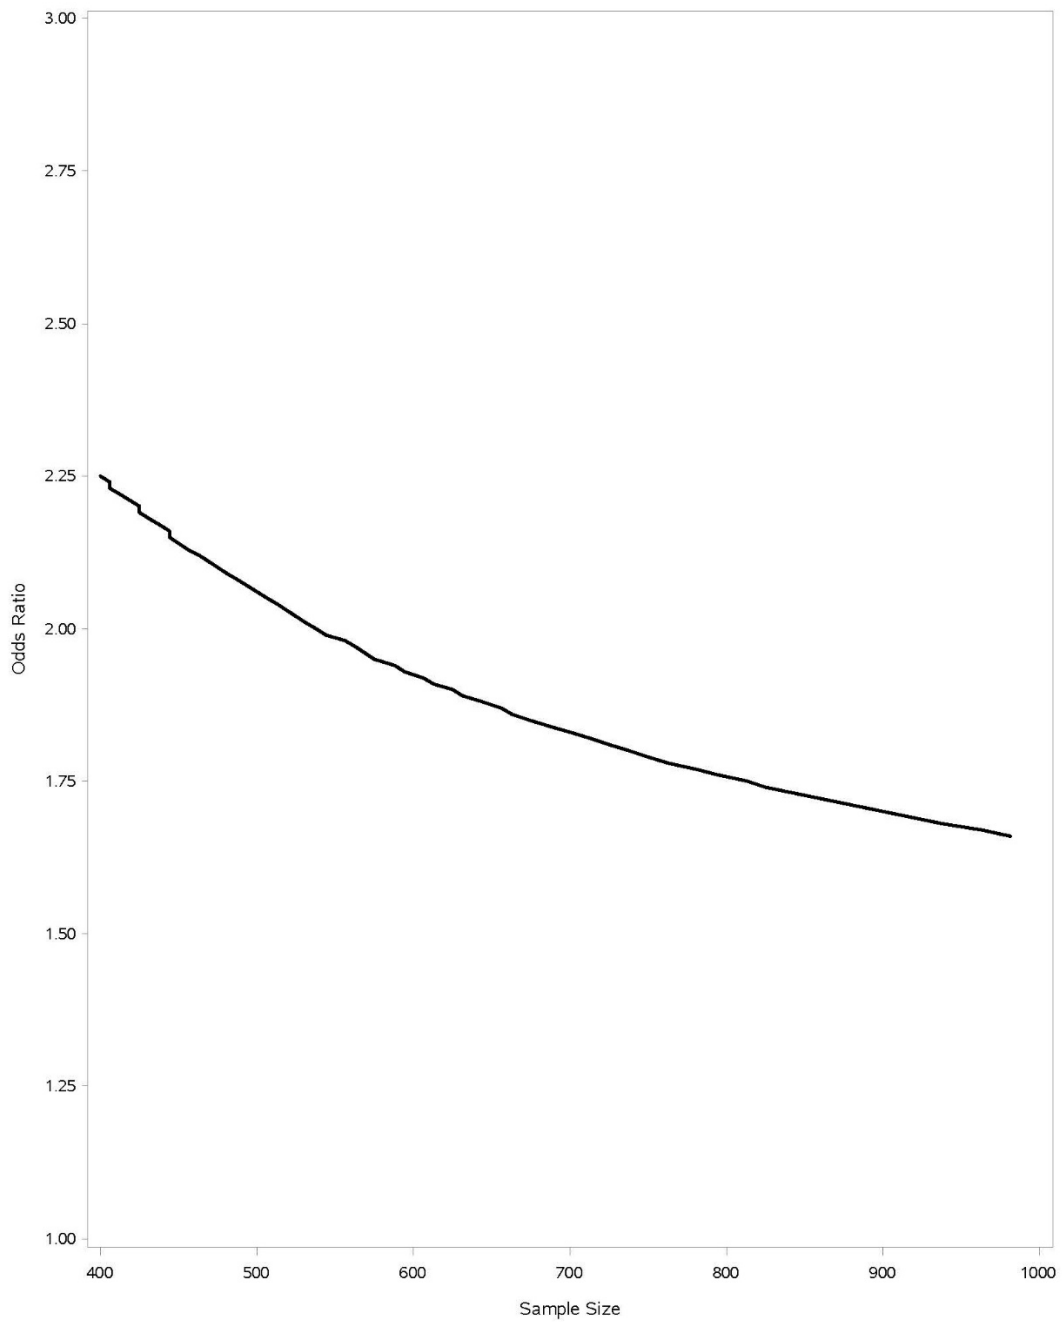

**SUPPLEMENTAL FIGURE 2.** Sample sizes of enrollment in the Diabetes Related to Acute Pancreatitis and its Mechanisms (DREAM) Study needed to identify odds ratios for incident diabetes with 80% statistical power using a nested case-control study design with 1:4 allocation ratio.
